# Supplementary material for: PKA regulation of neuronal function requires the dissociation of catalytic subunits from regulatory subunits
Source: eLife. 2024 Nov 7;13:RP93766. doi: 10.7554/eLife.93766 (PMC11542917; doi:10.7554/eLife.93766)
Supplement: Figure 1—figure supplement 1—source data 1. [file elife-93766-fig1-figsupp1-data1.xlsx]

## Sheet: panel A
	norm. expression level	0.41556	0.66189	0.63681	1.2038	2.082	0.26686
spine enrichment index	rest	-0.66553	-0.53696	-0.54021	-1.2743	-0.6648	-1.407
	NE	-0.25164	-0.014984	0.1277	-0.13701	-0.098661	-0.74797
	F+I	0.74509	0.44937	0.47803	0.70729	0.63839	0.78654

## Sheet: panel B
	norm. expression level	1.9699	0.11521	1.0997	0.81516	0.40183	2.0243	0.57389
spine enrichment index	rest	0.21219	0.15763	-0.029283	-0.079545	-0.0066828	0.14212	-0.19984
	NE	0.23586	0.27766	-0.033337	-0.040518	-0.087516	0.21922	0.31614
	F+I	0.30984	0.32801	0.43583	0.24544	0.19687	0.58734	0.64318
