# Supplementary material for: PKA regulation of neuronal function requires the dissociation of catalytic subunits from regulatory subunits
Source: eLife. 2024 Nov 7;13:RP93766. doi: 10.7554/eLife.93766 (PMC11542917; doi:10.7554/eLife.93766)
Supplement: Figure 1—figure supplement 2—source data 1. [file elife-93766-fig1-figsupp2-data1.xlsx]

## Sheet: Sheet1
		-6	-4	-2	0	2	4	6	8	10	12	14	16	18
	Spine enrichment Index; PKA-C w/ RIIalpha	-1.2689	-0.96955	-1.569	-1.4178	0.1215	-0.47985	-0.34076	-0.81755	0.93801	0.49579	0.69866	0.69026	0.67322
		-1.4702	-1.6042	-1.4267	-0.9162	-0.067506	-0.415	-0.70957	-0.66273	0.17552	0.35321	0.57595	0.8312	0.69477
		-1.0365	-1.3233	-0.94571	-1.3135	0.26504	-0.21433	-0.98937	-0.43276	0.42935	0.46548	0.55541	0.060279	0.30146
		-1.0082	-1.1954	-1.1339	-1.3107	0.028151	-1.015	-1.043	-1.1021	0.20738	0.4836	0.53688	0.85156	0.92442
		-1.2607	-1.1682	-1.5597	-1.4748	-0.57308	-1.0169	-1.1634	-1.594	0.22044	0.077945	0.19786	0.51178	0.26243
		-1.0675	-0.75294	-0.78787	-0.53987	0.2194	-0.89421	-0.67683	-0.95759	0.12387	0.23602	0.11433	0.012815	0.24093
		-1.9255	-0.69472	-1.1911	-0.70143	-1.5966	-0.58706	-1.0127	-1.3364	0.28909	0.3063	0.21159	0.44369	0.10907
		-0.86228	-1.16	-0.86474	-0.95211	-0.76619	-1.3554	-0.72437	-1.3397	0.24521	0.26083	0.32865	0.27227	0.32903
		-0.42949	-0.31071	-0.33812	-0.30564	0.016724	0.040205	0.088861	-0.13103	-0.16064	0.39851	0.74867	0.77202	0.7029
		-0.38296	-0.20727	-0.19869	0.11832	0.34126	0.28554	0.17183	-0.088765	0.11376	0.73652	1.1	1.0906	1.1009
		-0.57026	-0.29961	-0.29041	-0.53631	-0.26611	-0.16074	-0.1984	-0.1145	-0.21187	0.16822	0.31653	0.44646	0.78883
		-0.28681	-0.33168	-0.10753	-0.21195	0.18142	0.3495	0.099728	0.11435	0.074471	0.44246	1.4144	1.504	1.0279
		-0.27505	-0.42466	-0.27767	-0.53741	0.19779	0.13602	0.054966	-0.27045	-0.0036284	0.80206	1.2965	1.1417	1.2075
		-0.6222	-0.4881	-0.62814	-0.59181	-0.089754	-0.22432	-0.11158	-0.18932	0.71528	1.0371	1.1879	1.1776	0.89862
		-0.20354	-0.1541	-0.39602	-0.29167	0.27167	-0.081661	-0.064508	-0.13628	0.23828	0.67789	1.0504	0.64287	1.1538
		-0.51614	-0.35315	-0.63817	-0.40356	-0.30869	-0.26305	-0.39481	-0.57003	-0.12605	0.20631	0.30004	0.18092	0.21082
