# Supplementary material for: PKA regulation of neuronal function requires the dissociation of catalytic subunits from regulatory subunits
Source: eLife. 2024 Nov 7;13:RP93766. doi: 10.7554/eLife.93766 (PMC11542917; doi:10.7554/eLife.93766)
Supplement: Figure 1—figure supplement 3—source data 1. [file elife-93766-fig1-figsupp3-data1.xlsx]

## Sheet: Sheet1
	Time (min)	-6	-4	-2	0	2	4	6	8	10	12	14	16	18
	Spine enrichment Index; RIalpha	0.11211	0.092881	0.23606	0.11501	0.17588	-0.020692	0.13634	0.043207	0.052263	-0.034769	0.034983	-0.16189	-0.0082255
		-0.38095	-0.45954	-0.40089	-0.19721	-0.17634	-0.17062	-0.32848	-0.16767	-0.34881	-0.25083	-0.18049	-0.28791	-0.29315
		-0.46699	-0.22809	-0.21505	-0.1531	-0.25578	-0.2584	-0.23823	-0.2913	-0.20444	-0.2336	-0.22701	-0.18289	-0.22566
		0.027173	-0.16513	-0.18944	-0.11213	-0.21063	-0.13442	-0.17346	-0.10816	-0.26045	-0.11155	-0.18627	-0.034418	-0.33316
		-0.26939	-0.3263	-0.41012	-0.04167	-0.096205	-0.25154	-0.059001	-0.22247	-0.21739	-0.046842	-0.18036	-0.23608	0.088736
		-0.33729	-0.32658	-0.28784	-0.23251	0.036498	-0.087061	-0.37864	-0.33935	-0.47974	-0.51895	-0.46626	-0.45719	-0.26519
		-0.44134	-0.35886	-0.3026	-0.25073	-0.32517	-0.42285	-0.38479	-0.43076	-0.44324	-0.57004	-0.44783	-0.057696	-0.28809
		-0.38177	-0.42563	-0.52671	-0.20902	-0.2037	-0.0060014	-0.28345	-0.16086	-0.42682	-0.21418	-0.16578	-0.29459	-0.33252
		0.098512	-0.0048482	0.15751	-0.038078	0.48431	0.21336	0.54364	0.019166	0.21818	0.22355	0.136	0.052682	0.19689
		-0.30265	-0.4796	-0.49162	0.13888	-0.066307	-0.44936	-0.13973	-0.12265	-0.30852	0.17828	-0.17556	0.55971	0.080131
		-0.42639	-0.333	-0.43242	-0.20661	-0.70086	-0.64612	-0.46914	-0.46112	-0.37967	-0.22534	-0.6213	-0.42601	-0.15191
		0.032488	-0.20954	-0.0070306	0.058712	-0.16488	-0.31558	-0.26596	0.041643	-0.33733	-0.13971	-0.094019	-0.093585	-0.15853
		-0.81995	-0.3206	0.20206	0.027632	-0.44555	-0.32472	-0.42385	-0.15169	-0.031588	-0.25018	-0.78842	-0.070518	-0.39902
		-0.43167	-0.14585	-0.012583	0.20378	-0.10975	-0.22167	0.082858	-0.017968	0.11066	0.080003	-0.066851	-0.030956	-0.012561
		-0.93281	-0.80806	-0.22238	-0.39482	-0.30831	-0.57655	0.025726	0.45988	0.69425	0.032213	-1.0385	-0.32829	0.073018
		-0.94701	-0.33846	-0.98235	-0.44394	-0.69349	-0.75241	-0.40698	-0.42041	-0.74326	-0.57856	-0.69712	-0.88137	-1.0526
	Spine enrichment Index; PKA-C w/ Rialpha	-0.32605	-0.202	0.038561	-0.23261	0.0017697	-0.028729	-0.076594	-0.18553	-0.075183	0.16658	0.2512	0.095071	0.17711
		-0.14057	-0.25326	-0.067985	-0.19407	-0.29686	-0.087895	0.024891	0.038815	-0.012334	0.084263	0.16716	0.32827	0.22784
		-0.2208	-0.26239	-0.027367	-0.10226	0.16957	-0.036749	0.032901	0.10729	0.001599	0.074834	0.34093	0.33002	0.42346
		-0.03339	0.012462	0.032069	-0.052863	0.17266	0.23101	0.29915	0.25671	0.24253	0.35596	0.58669	0.64036	0.62756
		-0.1774	-0.17638	-0.19525	-0.23088	0.13558	-0.068071	-0.095411	-0.088849	0.10135	-0.047491	0.025882	-0.13726	0.10006
		0.017225	-0.052496	-0.13927	-0.12224	0.11325	0.096701	0.038165	-0.045657	0.0026793	-0.042943	0.11711	0.11566	0.052445
		-0.10032	-0.042088	0.13828	0.19862	0.013849	0.029835	0.064371	0.15318	0.02024	0.10844	0.096174	0.090328	0.11447
		-0.31882	-0.2865	-0.096477	-0.1055	-0.19553	0.0090603	-0.10688	-0.01898	0.00072418	-0.050331	-0.13262	0.015109	-0.090594
		0.29726	0.18184	0.40998	0.31968	0.13803	0.10743	-0.15171	0.19488	0.33317	0.13302	0.16933	0.56383	0.2732
		0.084224	0.10653	0.099903	-0.13216	0.076146	0.088744	-0.11015	-0.025918	0.037067	-0.031658	0.092256	0.0053617	0.12039
		0.14762	0.14607	0.33257	0.26686	0.38334	0.34659	0.52218	0.27078	0.44659	0.8444	0.69836	0.64406	0.34654
		-0.24014	-0.012418	-0.10009	-0.16968	-0.014128	0.061004	-0.063843	0.036116	-0.021441	0.074266	0.23928	-0.052914	0.36758
		-0.3433	-0.16793	-0.18111	-0.18151	0.031349	-0.16778	-0.22001	0.073544	-0.11718	-0.082739	0.052008	0.13548	0.13221
		0.10113	-0.11168	-0.029285	0.17042	0.29464	0.37063	0.25645	0.05206	0.022372	0.090767	0.050329	0.091361	0.080659
		0.14939	0.18005	0.11671	0.30174	0.18603	0.40787	0.0042819	0.15467	-0.049048	0.052407	0.21698	-0.25975	0.24725
		0.10467	0.20196	0.24044	0.19925	0.26924	0.32482	0.61347	0.20536	0.16471	0.42666	0.59359	0.41895	0.21774
		-0.3563	-0.39326	-0.33325	-0.1983	-0.053206	-0.045859	0.072801	0.049136	0.050804	-0.041551	0.086792	0.13148	0.14233
		-0.33047	0.070295	-0.13442	0.060919	0.31054	0.10735	-0.13016	0.11021	0.10555	0.19183	0.10115	0.21603	0.31909
		0.15366	0.43775	0.38747	0.18841	0.39855	0.65845	0.38028	0.56418	0.41566	1.2082	1.0422	0.9404	0.97522
		0.032575	-0.15478	0.28188	-0.38577	0.34174	0.063301	0.14415	0.14289	0.49487	0.54784	0.071739	0.53208	0.70006
