# Supplementary material for: PKA regulation of neuronal function requires the dissociation of catalytic subunits from regulatory subunits
Source: eLife. 2024 Nov 7;13:RP93766. doi: 10.7554/eLife.93766 (PMC11542917; doi:10.7554/eLife.93766)
Supplement: Figure 1—source data 1. [file elife-93766-fig1-data1.xlsx]

## Sheet: Figure 1C
	RIIalpha	-1.3826	-1.5377	-1.5582	-1.3088	-1.1596	-1.2571	-0.99535	-1.2584	-0.87702	-0.62838	-0.51958	-0.9511	-0.70352	-1.8034	-1.2384	-0.91947	-0.65417	-1.11	-1.1934	-1.4371	-1.6284	-1.6662	-1.6288	-1.0644	-1.3363	-0.44042	-0.58487	-0.62152	-0.86072	-0.26376	-1.5129	-1.7516	-1.7449	-1.3514	-1.5526	-1.5786	-1.3506	-1.4814	-1.2401	-1.0171	-1.9423	-1.3331	-1.5423	-1.193	-1.4063	-1.5994	-1.0143	-1.673
	RIbeta	-0.73172	-0.46858	-0.75565	-0.49103	-0.80827	-0.53092	0.58564	-0.003341	0.19727	0.55549	-0.12231	-0.32515	-0.53947	-0.5413	-0.28813	-0.32559	0.27849	0.23426	0.26226	0.18975	0.31756	0.30895	-0.041187	0.015856	-0.048683	-0.11454	0.11148	-0.1758	-0.15865	-0.36532	0.28143	0.00249	0.075099	-0.2166
	C w/ RIIalpha	-0.42185	-0.65682	-0.65214	-0.81387	-0.62932	-0.85902	-0.71781	-0.95439	-0.40545	-0.63525	-0.35567	-0.4998	-0.3484	-0.39329	-0.25498	-0.49884	-0.45098	-1.3072	-1.1686	-1.2281	-1.1575	-1.0944	-0.72845	-0.68369	-0.39548	-0.54761	-0.4915	-1.5532	-1.2432	-1.0419	-1.4948	-1.6841	-1.0802
	C w/ RIbeta	0.20993	0.1854	0.090396	0.13511	0.13761	0.31346	0.051047	0.43834	0.15596	0.37111	0.14675	-0.19401	0.19041	0.0076415	0.012624	-0.10952	0.079458	-0.01449	0.19717	0.19532	-0.077744	0.048636	-0.04186	0.1801	-0.4424	0.099069	-0.6523	0.19321	0.11732	-0.5036	-0.070753	0.049055	0.019778	-0.076901	-0.22605	-0.22124
[truncated: 5 more columns]

## Sheet: Figure 1D
	Time (min)	-9	-6	-3	0	3	6	9	12	15	18	21	24	27	30	33
	Spine enrichment Index; RIIalpha	-1.3179	-1.4473	-1.1204	-1.2397	-1.3733	-1.3382	-1.2367	-0.8569	-0.94637	-1.3067	-1.3612	-1.1328	-1.2249	-1.1951	-1.3595
		-1.538	-1.5375	-1.4562	-1.6921	-1.7357	-1.5235	-1.5469	-1.4389	-1.3054	-1.4909	-1.5583	-1.5174	-1.3215	-1.2705	-1.5416
		-1.3998	-1.7166	-1.5515	-1.7469	-1.7394	-1.6781	-1.8467	-1.598	-1.5391	-1.7017	-1.5881	-1.8414	-1.7647	-1.6759	-1.6926
		-1.6424	-0.97519	-1.5366	-1.6883	-1.3022	-1.4387	-1.4574	-1.3891	-1.8104	-1.5871	-1.2593	-1.4147	-1.5714	-1.8999	-1.5229
		-1.1311	-1.1881	-1.1722	-1.387	-1.3279	-1.3379	-1.3083	-1.0918	-1.3924	-1.4482	-1.2685	-1.4832	-1.3378	-1.4255	-1.3329
		-1.4294	-1.0848	-1.2565	-1.5843	-1.2368	-1.4709	-1.6177	-1.4768	-1.7921	-1.731	-1.4468	-1.2664	-1.444	-1.5061	-1.4024
		-1.0071	-0.98361	-0.99508	-0.98324	-1.1314	-1.1769	-1.1915	-1.0816	-1.1185	-1.2773	-1.1326	-1.15	-1.027	-1.1929	-1.0147
		-1.2647	-1.252	-1.5689	-1.3337	-1.3918	-1.4325	-1.1337	-0.9613	-1.0344	-1.3878	-1.1969	-0.94548	-1.1146	-1.1579	-1.1906
		-0.93984	-0.81421	-0.88407	-1.243	-1.2988	-1.0394	-1.1061	-1.2405	-1.4091	-1.2807	-1.1032	-0.9756	-1.0238	-1.2596	-1.0955
		-0.67728	-0.57947	-0.64835	-0.91547	-0.88482	-0.75258	-0.84415	-0.85391	-0.8111	-0.93609	-0.88177	-0.77239	-0.77779	-0.81553	-0.86662
		-0.85659	-0.18256	-0.33611	-0.48298	-0.56325	-0.59118	-0.38976	-0.60619	-0.7877	-0.53042	-0.93894	-0.88986	-0.95133	-0.81799	-0.8102
		-1.0023	-0.89989	-0.46651	-0.75008	-0.88423	-0.74423	-0.782	-0.9412	-0.88751	-0.77054	-0.9426	-0.76946	-0.9356	-0.9163	-1.2005
		-0.61524	-0.7918	-0.68309	-0.80831	-0.82374	-0.63576	-0.58892	-0.48281	-0.55258	-0.66111	-0.89346	-0.75051	-0.79273	-0.90655	-0.58293
		-1.7777	-1.8292	-2.0964	-2.0937	-2.0243	-1.9791	-2.081	-2.468	-2.4005	-2.2099	-2.2266	-1.9595	-2.3737	-2.0678	-2.1088
		-1.0281	-1.4486	-1.4614	-1.2231	-0.91459	-1.3083	-1.0548	-1.2664	-0.68945	-0.82575	-1.325	-1.4812	-1.1289	-0.91659	-1.1481
		-1.0513	-0.78765	-0.87246	-0.91099	-0.86941	-1.0637	-1.1506	-0.89532	-1.1766	-0.88401	-1.1389	-1.2068	-1.0077	-1.2604	-1.1039
		-0.68472	-0.62362	-0.67246	-0.72665	-0.8844	-0.8614	-0.78141	-0.84293	-0.92791	-1.0282	-0.74938	-0.76212	-1.0025	-0.85164	-0.7736
		-1.2102	-1.0099	-1.0853	-1.2956	-1.0812	-1.0883	-1.0876	-1.2642	-1.2257	-1.5242	-1.5032	-1.6125	-1.5356	-1.4191	-1.6695
		-1.0626	-1.3243	-1.2738	-0.97801	-1.3412	-0.86205	-1.4413	-0.96131	-1.0472	-1.1733	-1.4881	-1.2147	-1.2799	-1.478	-1.6953
		-1.4448	-1.4295	-1.3133	-1.1171	-1.2476	-1.5435	-1.3032	-1.4711	-1.5843	-1.4199	-1.6215	-1.3364	-1.4459	-1.5576	-1.5813
		-1.7894	-1.4675	-1.6548	-1.5168	-1.4279	-1.5059	-1.5106	-1.467	-0.93678	-1.4019	-1.5168	-1.5094	-1.5835	-1.5084	-1.5208
		-1.7088	-1.6236	-1.7568	-1.6418	-1.4939	-1.6964	-1.6366	-1.8511	-1.505	-1.6069	-1.5332	-1.586	-1.6202	-1.5913	-1.5555
		-1.6786	-1.5791	-1.5845	-1.5382	-1.6395	-1.3567	-1.2455	-1.6334	-1.6268	-1.4607	-1.2558	-1.4786	-1.5502	-1.2494	-1.2948
		-1.0139	-1.115	-0.99472	-1.1784	-0.92139	-1.2352	-1.1076	-1.3245	-1.3728	-1.2881	-1.2223	-1.1723	-1.1792	-1.2474	-1.1169
		-1.4157	-1.2569	-1.2805	-1.3562	-1.3113	-1.2204	-1.2599	-1.1038	-1.1011	-1.3805	-1.4748	-1.2865	-1.4045	-1.4966	-1.3914
		-0.38035	-0.50049	-0.56402	-0.64456	-0.8163	-0.75876	-0.68685	-0.79212	-0.78537	-0.47225	-0.57647	-0.84811	-0.43346	-0.37819	-0.5106
		-0.52496	-0.64478	-0.50252	-0.6473	-1.0009	-0.69657	-0.53085	-0.94951	-0.58873	-0.76353	-0.99893	-0.66693	-0.66107	-0.88164	-0.92626
		-0.73936	-0.50367	-0.2734	-0.24399	-0.32096	-0.44621	-0.29518	-0.16679	-0.31986	-0.32201	-0.27205	-0.2583	-0.47937	-0.33695	-0.65067
		-0.85565	-0.8658	-1.0292	-0.84451	-0.65133	-1.0877	-1.2506	-0.94904	-0.75058	-0.48199	-0.83377	-0.43618	-0.8523	-0.82039	-0.59493
		-0.28377	-0.24375	-0.35738	-0.44509	-0.56136	-0.67382	-0.61452	-0.4481	-0.42187	-0.41127	-0.50005	-0.55559	-0.41728	-0.44696	-0.34329
		-1.5607	-1.465	-1.2982	-1.4798	-1.426	-1.5971	-1.6461	-1.8055	-1.6937	-1.5481	-1.726	-1.606	-1.5482	-1.755	-1.4646
		-1.7378	-1.7654	-1.8347	-1.763	-1.6163	-1.8199	-1.6854	-1.5832	-1.697	-1.4817	-1.8311	-1.8332	-1.6535	-1.5541	-1.5789
		-1.7644	-1.7253	-1.7583	-2.1048	-1.9513	-1.9464	-1.9474	-1.8403	-1.8238	-1.6654	-1.6195	-1.7419	-1.7341	-2.1022	-1.6382
		-1.4574	-1.2453	-1.1155	-1.6641	-1.7697	-1.7354	-1.7997	-1.6801	-1.4519	-1.2645	-1.6859	-1.727	-1.6437	-1.7542	-1.8488
		-1.674	-1.4311	-1.7194	-1.2284	-1.637	-1.4024	-1.5612	-1.7469	-1.6342	-1.7215	-1.435	-1.7904	-2.0323	-2.1152	-1.5805
		-1.5075	-1.6497	-1.6263	-1.7681	-1.6304	-1.8275	-1.6874	-1.6511	-1.5141	-1.7556	-1.8872	-1.8685	-1.7265	-1.7995	-1.713
		-1.3766	-1.3246	-1.2264	-1.1655	-1.4502	-1.4589	-1.6463	-1.3927	-1.2554	-1.1921	-1.096	-1.1613	-1.4082	-1.2041	-1.3224
		-1.4203	-1.5426	-1.4926	-1.5325	-1.4249	-1.5006	-1.1687	-1.3425	-1.3388	-1.4567	-1.3823	-1.4741	-1.4303	-1.5461	-1.4809
		-1.2719	-1.2084	-1.3568	-1.3469	-1.2927	-1.5074	-1.7667	-1.2502	-1.4674	-1.3118	-1.538	-1.3827	-1.5122	-1.2456	-1.0969
		-0.9397	-1.0946	-1.1324	-1.1307	-1.1872	-1.0784	-1.3568	-1.3016	-1.1578	-1.2439	-1.219	-1.2507	-1.0072	-1.0307	-1.3588
		-1.8545	-2.0301	-1.9166	-1.5965	-1.6853	-1.9609	-1.8894	-1.929	-1.929	-1.7893	-1.8626	-1.7993	-1.6234	-1.8613	-1.9303
		-1.159	-1.5071	-1.2509	-1.0495	-1.095	-1.3075	-1.0725	-1.2731	-1.2731	-1.3438	-1.172	-1.2045	-1.1927	-1.3902	-1.1737
		-1.4175	-1.6672	-1.6232	-1.4896	-1.6597	-1.8286	-1.5598	-1.2489	-1.2489	-1.8688	-1.6684	-1.8458	-1.9381	-1.7286	-1.9548
		-1.1839	-1.2022	-1.3019	-1.2401	-1.307	-1.1881	-1.1017	-1.0314	-1.0314	-0.92193	-1.2922	-1.1397	-0.81079	-1.1698	-1.3429
		-1.3741	-1.4385	-1.3468	-1.237	-1.6088	-1.7027	-1.6142	-1.3433	-1.3433	-0.98354	-1.3513	-0.67669	-0.73055	-1.5987	-1.2995
		-1.6003	-1.5984	-1.5884	-1.4441	-1.7099	-1.8271	-1.9018	-1.6927	-1.5397	-1.8289	-1.8106	-1.7119	-1.726	-1.8461	-1.8538
		-0.9563	-1.0723	-1.3638	-0.95137	-1.0624	-0.93188	-0.93898	-1.1237	-1.2485	-1.1418	-1.2364	-0.94226	-0.86447	-0.63189	-0.82328
		-1.717	-1.629	-1.662	-1.6563	-1.2752	-1.6654	-1.6804	-1.5945	-1.5727	-1.5611	-1.7655	-1.6864	-1.6585	-1.8574	-1.7332
		-0.58883	-0.51007	-0.3558	-0.75097	-0.56107	-0.13162	-1.0666	-1.0369	-0.54491	-0.85182	-0.79282	-0.77706	-0.97734	-1.0331	-1.0516
		-2.1889	-2.0085	-1.9998	-1.9319	-2.1807	-2.0315	-1.8772	-2.1134	-1.7743	-1.9425	-1.7409	-2.0927	-1.8782	-2.1142	-1.8719
		-1.6296	-1.8887	-2.2236	-1.9459	-1.7539	-2.0569	-1.8586	-1.8312	-1.771	-2.0165	-1.729	-1.9305	-1.7743	-2.0732	-1.7392
		-1.79	-1.6735	-1.2769	-1.7099	-1.5008	-1.683	-1.7463	-1.3638	-1.9408	-1.4339	-1.8735	-1.6384	-1.1851	-1.31	-1.2449
		-1.2742	-1.773	-1.8319	-1.8145	-1.8504	-2.0515	-2.0454	-2.2655	-2.0587	-1.6873	-1.8439	-2.3122	-2.3842	-2.3363	-2.5318
	Spine enrichment Index; PKA-C w/ RIIalpha	-0.45951	-0.3842	-0.35462	-0.40537	-0.1035	-0.19464	-0.15938	-0.097769	-0.067322	0.63134	0.65016	0.68085	0.58485	0.61499	0.60754
		-0.64151	-0.67213	-0.74373	-0.77466	-0.14669	-0.4395	-0.24737	-0.26192	-0.6223	0.84456	0.86686	0.65989	0.94599	0.85391	0.50909
		-0.6289	-0.67539	-0.559	-0.61123	0.027679	-0.39386	-0.11156	-0.54127	-0.38975	0.79092	0.86642	0.87307	0.92079	0.82789	0.91979
		-0.81063	-0.81712	-0.8402	-0.82488	-0.20379	-0.41618	-0.21022	-0.30498	-0.52393	0.87285	0.91623	0.83163	0.70491	0.98659	0.66962
		-0.60325	-0.6554	-0.69665	-0.70495	-0.2465	-0.44337	-0.30558	-0.24647	-0.4033	0.64014	0.62964	0.59284	0.64931	0.60507	0.42238
		-0.7884	-0.92965	-0.78518	-0.85857	-0.084924	-0.48317	-0.36958	-0.18846	-0.50456	0.70958	0.70265	0.87717	0.56843	0.85817	0.6415
		-0.71524	-0.72039	-0.67932	-0.90719	-0.38294	-0.58763	-0.35781	-0.21951	-0.43671	0.56665	0.58364	0.60969	0.7557	0.60284	0.55247
		-0.97871	-0.93007	-0.63283	-1.0483	-0.12314	0.073924	-0.12627	-0.098295	-0.042293	0.64718	0.54626	0.49074	0.50269	0.55441	0.54726
		-0.4301	-0.3808	-0.3396	-0.42599	-0.16466	0.22463	0.2128	0.068379	0.04689	0.66292	0.52623	0.34906	0.38902	0.24513	0.37648
		-0.66634	-0.60415	-0.52775	-0.80195	-0.21395	0.065363	-0.077146	-0.18369	0.45339	0.75671	0.42375	0.49414	0.32965	0.4881	0.40462
		-0.35217	-0.35918	-0.47453	-0.27286	-0.056967	0.31038	-0.014125	-0.1301	0.16171	0.69037	0.078794	0.32089	0.068018	0.164	0.38742
		-0.39107	-0.60854	-0.7101	-0.55891	-0.22897	0.043147	-0.07018	-0.32213	-0.14427	0.76769	0.67181	0.56541	0.59329	0.63044	0.28165
		-0.33071	-0.36609	-0.43286	-0.40578	0.11952	-0.035598	0.052331	-0.033756	0.2181	0.19832	0.41374	0.40435	0.37997	0.15808	0.24192
		-0.43507	-0.35151	-0.58277	-0.45522	0.18508	-0.1449	-0.13948	-0.099256	0.078906	0.30337	0.41839	0.22485	0.3115	-0.13425	0.15327
		-0.22221	-0.28774	-0.47191	-0.62074	0.31861	0.077362	0.16973	0.20195	0.31525	0.43433	0.54285	0.73005	0.57521	0.59281	0.63478
		-0.61398	-0.3837	-0.63656	-0.46703	0.24669	0.22674	0.31464	0.26034	0.056018	0.47703	0.39745	0.3762	0.22615	0.3836	0.60906
		-0.41674	-0.48521	-0.57693	-0.70309	0.4153	0.015198	0.24126	0.26114	0.2446	0.64061	0.61774	0.61349	0.46876	0.69857	0.44124
		-1.3203	-1.294	-1.4979	-1.3738	-0.093247	-0.14388	-0.34938	-0.63421	-0.6918	0.43084	0.88059	0.72717	0.77649	0.83957	0.82801
		-1.1317	-1.2055	-1.1594	-1.3577	0.32096	0.10957	0.095992	-0.35688	-0.18646	0.91011	0.7698	0.86462	0.69084	0.80381	0.59207
		-1.1601	-1.2962	-1.2036	-1.1438	0.45101	0.21406	-0.1454	-0.45509	-0.31801	1.0349	0.89698	0.75182	0.82533	0.83803	0.92675
		-1.0811	-1.2339	-1.3225	-1.0452	0.12158	-0.010496	-0.069968	-0.39533	-0.38269	0.34464	0.38172	0.25926	0.3308	0.26651	0.36214
		-1.1933	-0.99549	-1.1881	-1.2176	-0.18157	-0.070484	-0.21629	-0.35451	-0.5644	0.66808	0.60734	0.49421	0.49607	0.5189	0.55252
		-0.79443	-0.66246	-0.77838	-0.60723	-0.28469	-0.21163	-0.1127	0.47	0.23703	0.5044	0.53089	0.27025	0.55782	0.38688	0.36812
		-0.65558	-0.71179	-0.95262	-0.79669	-0.48905	-0.27748	-0.25192	-0.47364	-0.16072	0.68208	0.62989	0.52052	0.68916	0.48556	0.51644
		-0.32854	-0.46242	-0.29775	-0.52029	-0.15891	-0.15265	0.02128	-0.17698	0.35519	0.63548	0.65997	0.39532	0.34424	0.46637	0.37142
		-0.55394	-0.54127	-0.75684	-0.86212	-0.35087	-0.10731	0.013614	-0.23849	0.13651	0.78019	0.63833	0.48373	0.66359	0.69139	0.59895
		-0.35179	-0.63121	-0.53839	-0.61304	-0.28593	-0.30798	-0.16358	-0.21415	0.19261	0.63836	0.73285	0.45397	0.72389	0.57627	0.44745
		-1.3326	-1.7737	-1.6331	-1.7156	-1.2597	-0.27108	-0.78266	-0.73786	-1.0915	-1.0662	0.57436	0.45852	0.58609	0.77696	0.7894
		-1.0186	-1.4678	-1.4865	-0.996	-1.5131	-0.23168	-0.61465	-0.65836	-0.96163	-0.68573	0.50998	0.59059	0.65716	0.5935	0.47482
		-1.0442	-1.0396	-1.4345	-1.1988	-1.2465	-0.18473	-0.68451	-0.55352	-0.91425	-0.72787	1.3163	1.0585	1.0633	1.1388	1.2007
		-1.6074	-1.3822	-1.581	-1.7847	-1.4715	-0.38357	-1.0362	-1.3299	-1.3956	-1.3494	1.2101	1.2418	1.2208	1.1559	1.0147
		-1.4738	-1.8943	-1.4855	-1.3721	-1.4829	-0.33302	-0.46229	-0.73166	-0.90946	-0.75749	0.45284	0.55943	0.82251	0.71216	0.92515
		-1.0099	-1.1505	-1.1868	-1.3747	-0.85907	0.061412	-0.24245	-0.47653	-0.82221	-0.4694	0.87316	0.81038	0.81175	0.47898	0.7838

## Sheet: Figure 1E
	Time (min)	-9	-6	-3	0	3	6	9	12	15	18	21	24	27	30	33
	Spine enrichment Index; RIbeta	-0.65595	-0.80749	-0.59124	-0.72337	-0.73175	-0.80197	-0.77589	-0.68453	-0.61586	-0.69618	-0.74491	-0.64355	-0.71495	-0.72228	-0.59968
		-0.47941	-0.45775	-0.43751	-0.56174	-0.50157	-0.48958	-0.5222	-0.5168	-0.48292	-0.49272	-0.55098	-0.65271	-0.65958	-0.51583	-0.66107
		-0.82653	-0.68476	-0.80114	-0.69957	-0.82848	-0.9541	-0.70935	-0.84867	-0.79485	-0.97291	-0.94051	-0.78835	-0.96643	-0.86939	-0.85654
		-0.49282	-0.48924	-0.71126	-0.46643	-0.52429	-0.65873	-0.51497	-0.55107	-0.58183	-0.4691	-0.57052	-0.54312	-0.46457	-0.61564	-0.60066
		-0.77892	-0.83763	-0.77547	-0.77355	-0.75881	-0.70305	-0.70027	-0.54407	-0.60158	-0.82584	-0.77074	-0.66054	-0.88595	-0.77791	-0.84643
		-0.55879	-0.50306	-0.62252	-0.73747	-0.55485	-0.58454	-0.59465	-0.73755	-0.59949	-0.70385	-0.63268	-0.64127	-0.70067	-0.71603	-0.46137
		0.68647	0.48481	0.91179	0.43347	0.66789	0.98884	0.61384	0.60266	0.63074	0.67077	0.50246	0.63998	0.56503	0.51552	0.37695
		0.058768	-0.06545	0.28781	-0.15242	-0.14543	0.070025	-0.069455	-0.064253	-0.10412	-0.19397	-0.3201	-0.12065	-0.16694	-0.27721	0.019603
		0.50806	-0.11351	-0.10906	-0.13732	-0.22823	-0.076705	-0.042537	-0.14652	-0.059634	0.14077	-0.22828	-0.061654	-0.13511	-0.2059	-0.12311
		0.60919	0.50179	0.43308	0.4002	0.45867	0.47069	0.58659	0.47605	0.64137	0.32174	0.41407	0.44714	0.53937	0.48261	0.3112
		-0.015508	-0.22911	-0.43144	-0.19142	-0.21109	-0.18872	-0.14813	-0.001044	0.026937	0.18918	-0.176	-0.10732	-0.14352	0.07198	-0.11408
		-0.42141	-0.22888	-0.3047	-0.37784	-0.44748	-0.37121	-0.26929	-0.19625	-0.35179	-0.011509	-0.20481	-0.06463	-0.14876	-0.30814	-0.20579
		-0.52341	-0.55553	-0.40504	-0.36235	-0.27891	-0.2868	-0.3855	-0.13356	-0.2637	0.016263	-0.56398	-0.50246	-0.30495	-0.2153	-0.099322
		-0.58382	-0.49878	-0.35192	-0.22792	-0.34719	-0.32656	-0.35714	-0.39683	-0.42362	-0.31115	-0.28731	-0.50932	-0.18705	-0.19649	-0.39487
		-0.15399	-0.42228	-0.35526	-0.43491	-0.29821	-0.20326	-0.2916	-0.18058	-0.39371	-0.11958	-0.066736	-0.26794	-0.1767	-0.32111	-0.19358
		-0.32037	-0.33082	-0.30416	-0.33003	-0.35775	-0.18334	-0.43975	-0.26745	-0.15086	-0.1883	-0.21208	-0.408	-0.38163	-0.27461	-0.097209
		0.27601	0.28098	0.30474	0.25252	0.25876	0.30672	0.30872	0.2073	0.24184	0.27398	0.14757	0.17849	0.23811	0.13628	0.13628
		0.22353	0.24499	0.13954	0.17617	0.075454	0.067231	0.2556	0.14522	0.21556	0.14468	0.12616	0.04681	0.04129	0.15519	0.15519
		0.21155	0.31298	0.3258	0.17334	0.21809	0.23315	0.18891	0.14465	0.23732	0.1686	0.049216	0.17986	0.16807	0.15917	0.15917
		0.19722	0.18228	0.15282	0.36569	0.19591	0.12015	0.25495	0.3446	0.098348	0.43765	0.49533	0.21151	0.16029	0.22279	0.22279
		0.42514	0.20997	0.1696	0.12556	0.11017	0.051953	0.059571	0.14584	0.080311	0.29932	0.33846	0.03637	0.08999	0.01709	0.01709
		0.26041	0.35749	0.27106	0.19567	0.28857	0.34395	0.30308	0.17071	0.19462	0.24907	0.099937	0.27947	0.3065	0.38567	0.38567
		-0.096775	0.014402	-0.17269	0.11017	0.091654	0.14172	0.15103	0.014363	0.10415	0.23234	0.0034318	-0.04091	-0.012101	-0.16545	0.11177
		-0.039233	0.070945	0.09509	0.10578	-0.13743	0.0063877	-0.077672	0.012316	0.071519	0.18657	-0.023786	0.035909	0.043025	0.078537	0.1666
		-0.081373	-0.015993	0.044284	-0.086728	0.1694	-0.11201	-0.098811	0.17705	-0.021903	-0.013917	0.00011361	0.2978	-0.2728	0.17843	-0.076187
		-0.077043	-0.15203	-0.040807	-0.10112	-0.15665	-0.15664	-0.055576	-0.0064647	-0.55454	-0.065385	-0.1663	0.051035	-0.32356	-0.19601	-0.17388
		0.10125	0.12171	8.15e-05	0.046011	-0.10348	-0.3045	-0.24322	-0.073811	-0.3068	-0.30003	-0.055448	-0.15388	-0.12027	-0.093062	-0.093062
		-0.22444	-0.12717	-0.26583	-0.25084	-0.18528	-0.22098	-0.36219	-0.17392	-0.34593	-0.47364	-0.29646	-0.15367	-0.14458	-0.017797	-0.017797
		-0.21228	-0.10503	-0.17298	-0.24322	-0.30971	-0.25431	-0.22053	-0.11405	0.029673	0.077399	-0.12726	-0.13846	-0.095264	-0.067277	-0.067277
		-0.48861	-0.24203	-0.21621	-0.24058	-0.32749	-0.27996	-0.28613	-0.17339	-0.39894	-0.21963	-0.11783	-0.064888	-0.30035	-0.44814	-0.44814
		0.31007	0.2528	0.35436	0.29936	0.29747	0.45616	0.30415	0.26279	0.26005	0.2989	0.28161	0.29055	0.28934	0.28555	0.28555
		-0.10533	0.11031	0.015123	0.018601	-0.14232	-0.093701	0.11583	-0.046986	-0.055164	-0.079364	0.11977	-0.069985	0.030926	-0.044542	-0.044542
		0.10885	0.041349	0.042768	0.13435	0.10048	0.092139	0.12083	0.0028586	0.042219	0.036935	0.089408	0.0049705	0.02674	0.066398	0.066398
		-0.11659	-0.31661	-0.25624	-0.17543	-0.2109	-0.3446	-0.14755	-0.24912	-0.24396	-0.11203	-0.12257	0.01282	-0.027254	-0.31285	-0.31285
	Spine enrichment Index; PKA-C w/ RIbeta	0.21348	0.20637	0.092357	0.22042	0.034437	0.24425	0.4871	0.25648	0.47079	0.28381	0.4507	0.20887	0.36143	-0.021139	0.21971
		0.11241	0.25838	0.18783	-0.082775	-0.075908	0.25023	0.31053	0.40548	0.079528	0.47382	0.33627	0.38346	0.087276	0.23113	0.37697
		0.096429	0.084362	0.22144	0.27949	0.24227	0.2921	-0.071322	-0.022664	0.090858	0.27465	0.10877	0.40844	0.31842	0.26017	0.19098
		0.043415	0.22681	0.25358	-0.032757	0.095121	0.28603	0.21734	0.38882	0.38542	0.61671	0.40849	0.62078	0.48882	0.5638	0.52105
		0.090435	0.18479	0.30573	0.46933	0.062579	0.32175	0.23565	0.35137	0.40695	0.29629	0.24498	0.28083	0.40177	0.45537	0.37577
		0.38362	0.24331	0.21499	0.28438	0.27416	0.14695	0.27945	0.14729	0.42689	0.54193	0.41317	0.3361	0.43389	0.3649	0.36424
		0.044341	0.057753	-0.20654	-0.11881	-0.030991	-0.0055191	0.023296	0.091316	0.16041	0.083318	0.19799	0.12573	0.075986	0.11596	0.17523
		0.4837	0.39298	0.353	0.30791	0.47717	0.32522	0.60582	0.54625	0.61072	0.63277	0.51234	0.27607	0.50383	0.52176	0.50975
		0.11991	0.19202	0.035537	0.17603	0.31037	0.12064	0.11978	0.21962	0.032851	0.35035	0.15127	0.14291	0.19592	0.16055	-0.015929
		0.37054	0.37167	0.39115	0.43574	0.55836	0.41965	0.35993	0.32155	0.47767	0.32829	0.36528	0.3114	0.35426	0.30361	0.30248
		0.19651	0.096994	-0.0054767	-0.38562	-0.098051	-0.04283	-0.22764	0.073207	0.11494	0.62979	0.76757	0.71612	0.44685	0.38188	0.66669
		-0.19717	-0.19086	-0.082213	0.0024702	-0.21619	0.009271	-0.1274	0.017917	0.14778	0.40252	0.14268	0.34435	0.24851	0.23484	0.11363
		0.066533	0.31429	0.031559	0.11971	0.39031	0.22327	0.31167	0.1459	0.16515	0.70194	0.57677	0.57414	0.52905	0.69186	0.46173
		-0.095627	0.11091	-0.15813	0.057553	0.073326	-0.029227	-0.027699	-0.082755	-0.17658	0.69569	0.50893	0.34742	0.46979	0.29773	0.2827
		-0.064841	0.090088	0.067847	-0.15584	-0.12799	-0.056783	-0.095618	-0.13639	0.062478	0.23442	0.18319	0.10768	0.12125	0.17791	0.083647
		-0.17002	-0.049028	-0.041778	-0.029499	-0.26037	-0.084219	-0.14746	-0.14171	-0.17628	0.16417	0.22142	0.22458	0.29626	0.2798	0.28627
		0.12804	0.030877	0.011441	-0.064218	0.11168	-0.093128	0.09742	-0.065349	-0.031492	0.18704	0.51062	0.34929	0.32897	0.12972	0.22252
		0.11725	-0.14623	-0.039456	-0.25952	0.0015349	-0.22347	-0.35153	-0.17887	-0.27602	-0.024832	0.045784	0.087974	0.047933	0.069319	0.08126
		0.1592	0.23514	0.043062	0.1822	0.16678	0.15929	0.051506	-0.069763	0.098294	0.23808	0.0096415	0.42762	0.24406	0.18374	0.18696
		0.30403	0.086602	0.45146	0.40195	-0.016368	0.29327	0.24721	0.015183	0.18427	0.51344	0.60441	0.7695	0.63722	0.8587	0.8587
		0.002713	-0.1582	0.16233	-0.13648	-0.054682	0.10489	0.37523	0.20688	0.32272	0.92454	0.55935	0.60147	0.39348	0.46385	0.46385
		0.023748	0.073524	0.028219	0.080855	0.039461	0.18848	0.19014	0.26013	0.13273	0.89868	0.73124	0.72773	0.57215	0.59363	0.59363
		-0.027612	-0.056107	-0.057614	-0.059002	0.09596	-0.25515	0.077867	0.15755	0.08193	0.46664	0.60891	0.63318	0.5312	0.54495	0.54495
		0.1462	0.214	0.12622	0.14586	0.049869	0.10488	0.20567	0.16531	0.30654	0.5017	0.43277	0.56156	0.38943	0.37533	0.37533
		-0.44431	-0.4405	-0.64655	-0.59912	0.065997	0.024845	0.040419	0.036675	0.0091961	0.63707	0.90939	0.75485	0.82385	0.69136	0.84007
		0.13694	0.061198	0.083187	-0.065473	0.27067	0.31455	0.28853	0.13072	0.031998	-0.081191	0.23854	0.25721	0.32676	0.11932	0.30304
		-0.66028	-0.64432	-0.29723	-0.44606	0.37724	0.24233	0.27714	0.069934	0.66063	0.61923	0.59839	0.48053	0.61974	0.53999	0.52014
		0.16131	0.22512	0.022853	-0.046038	0.23535	0.67884	0.44941	0.45139	0.45567	0.68436	0.62514	0.64281	0.65714	0.5274	0.62415
		0.041433	0.1932	0.02634	0.055598	0.57301	0.54176	0.43614	0.58201	0.33561	0.69878	0.69928	0.79504	0.47164	0.50033	0.49777
		-0.56538	-0.44183	-0.38766	-0.43315	0.02068	0.046738	0.40523	0.12131	0.56772	0.44554	0.78836	0.53497	0.64544	0.425	0.14592
		-0.08881	-0.052696	-0.13031	-0.14997	-0.049428	-0.023458	-0.066706	0.0042823	-0.041062	0.11079	0.37748	0.44604	0.29155	0.24275	0.16287
		0.045965	0.052145	0.039838	-0.16576	-0.053392	0.0070628	0.066863	0.11286	-0.0019331	0.24585	0.18218	0.21944	0.15514	0.26669	0.29638
		0.10514	-0.065584	-0.12184	-0.32935	-0.013899	-0.17695	-0.0049308	-0.040843	-0.0052229	0.41024	0.25927	0.031679	0.18678	0.275	0.23199
		-0.088482	-0.06532	-0.0024608	-0.020393	-0.11627	-0.052458	-0.067883	-0.088489	-0.036259	0.31142	0.19001	0.22841	0.20686	0.21126	0.24306
		-0.22488	-0.22722	0.058504	-0.069936	-0.36013	-0.47878	-0.28095	-0.20694	-0.29375	0.14247	0.18372	0.24446	0.079667	0.17264	0.35018
		-0.25478	-0.18769	-0.321	-0.16379	-0.0098914	-0.094222	0.1105	0.27617	-0.0061908	0.16059	0.27998	0.39959	0.27843	0.35513	0.13018
