# Supplementary material for: PKA regulation of neuronal function requires the dissociation of catalytic subunits from regulatory subunits
Source: eLife. 2024 Nov 7;13:RP93766. doi: 10.7554/eLife.93766 (PMC11542917; doi:10.7554/eLife.93766)
Supplement: Figure 2—source data 1. [file elife-93766-fig2-data1.xlsx]

## Sheet: Figure 2C
	RIIalpha	-1.3826	-1.5377	-1.5582	-1.3088	-1.1596	-1.2571	-0.99535	-1.2584	-0.87702	-0.62838	-0.51958	-0.9511	-0.70352	-1.8034	-1.2384	-0.91947	-0.65417	-1.11	-1.1934	-1.4371	-1.6284	-1.6662	-1.6288	-1.0644	-1.3363	-0.44042	-0.58487	-0.62152	-0.86072	-0.26376	-1.5129	-1.7516	-1.7449	-1.3514	-1.5526	-1.5786	-1.3506	-1.4814	-1.2401	-1.0171	-1.9423	-1.3331	-1.5423	-1.193	-1.4063	-1.5994	-1.0143	-1.673
	RIIalpha + C	-0.42185	-0.65682	-0.65214	-0.81387	-0.62932	-0.85902	-0.71781	-0.95439	-0.40545	-0.63525	-0.35567	-0.4998	-0.3484	-0.39329	-0.25498	-0.49884	-0.45098	-1.3072	-1.1686	-1.2281	-1.1575	-1.0944	-0.72845	-0.68369	-0.39548	-0.54761	-0.4915	-1.5532	-1.2432	-1.0419	-1.4948	-1.6841	-1.0802
	R-C	-1.6724	-1.5522	-1.5291	-1.669	-1.5352	-1.391	-1.2386	-1.6568	-1.6284	-1.6042	-0.51588	-0.54538	-0.52743	-0.56324	-1.7691	-2.0092	-1.8683	-1.2046	-1.2184	-1.6938	-1.4953	-1.8618	-1.7768	-0.90202	-0.7796	-0.65084	-0.97055	-0.87023	-1.0358	-0.9645	-1.218	-1.295	-1.1747	-1.6057	-1.7553	-1.3174	-1.4284	-1.3115	-1.7876	-1.5428	-1.8138	-1.5761	-1.6604	-1.4521	-1.3634	-1.4398	-1.3305	-1.124
[truncated: 5 more columns]

## Sheet: Figure 2D
		RIIalpha + C			R-C
		rest	F+I		rest	F+I
		0	1.0331		0	0.1624
		0	1.3383		0	0.168
		0	1.526		0	0.2607
		0	1.642		0	0.0692
		0	1.143		0	0.0198
		0	1.6089		0	0.16455
		0	1.2955		0	0.0951
		0	1.5052		0	0.12075
		0	0.71625		0	0.2095
		0	1.0816		0	0.60281
		0	0.63138		0	0.36262
		0	0.95585		0	0.24034
		0	0.5484		0	0.23539
		0	0.4028		0	0.25474
		0	0.86877		0	0.14425
		0	0.99517		0	0.2795
		0	1.0209		0	0.2771
		0	2.1409		0	-0.0942
		0	1.8665		0	0.22222
		0	2.1105		0	0.32085
		0	1.4718		0	0.21915
		0	1.6301		0	0.7042
		0	1.1059		0	0.4422
		0	1.1847		0	0.55406
		0	0.81438		0	0.47249
		0	1.1928		0	0.43769
		0	1.0034		0	0.63686
		0	2.3363		0	0.7779
		0	1.7774		0	0.6448
		0	2.2117		0	0.22271
		0	2.5801		0	0.78571
		0	2.5027		0	0.49768
		0	1.7116		0	0.74284
					0	0.3877
					0	0.5984
					0	0.48695
					0	0.1265
					0	0.12315
					0	0.53195
					0	0.30705
					0	0.53155
					0	0.3477
					0	0.45205
					0	0.4842
					0	0.17605
					0	0.49874
					0	0.52608
					0	0.18138
