# Supplementary material for: PKA regulation of neuronal function requires the dissociation of catalytic subunits from regulatory subunits
Source: eLife. 2024 Nov 7;13:RP93766. doi: 10.7554/eLife.93766 (PMC11542917; doi:10.7554/eLife.93766)
Supplement: Figure 3—source data 1. [file elife-93766-fig3-data1.xlsx]

## Sheet: Figure 3B
			GFP transfection, control spines									shRNA, control spines																				shRNA co-expressed with R-C, control spines												shRNA co-expressed with wildtype PKA, control spines
	-12		1.044	1.0393	0.93913	0.94905	0.91429	0.80928	0.98519	0.92809		0.97804	0.98171	1.0398	0.96574	0.93424	0.94322	1.0656	0.97579	0.98106	0.97556	0.96146	0.92287	0.99701	0.95233	1.0057	1.0459	0.92754	1.0417	1.1045		0.99035	0.97927	1.0044	0.98734	0.90097	0.96832	1.0292	0.96624	1.0303	0.86378	1.1045		1.0558	0.95238	1.0253	0.97961	1.0051	1.0732
	-11		0.9836	1.1599	0.92088	0.91445	0.91866	0.9371	1.0101	1.0354		0.92551	1.0306	0.94838	0.97194	0.98914	0.93523	0.99619	1.0359	0.88203	0.98392	0.92324	0.93174	0.90812	0.94939	0.97328	0.9928	0.98081	0.97216	1.0065		1.0021	1.0077	1.0254	0.9954	0.94769	1.0646	1.0027	0.98244	1.0138	0.89136	1.0324		0.98075	1.2514	0.9862	0.97949	1.0121	1.0399
	-10		1.0077	1.06	1.0745	1.0295	1.0682	0.97549	1.0083	1.0155		0.94051	1.006	0.9691	1.0095	1.0141	1.0241	1.0316	1.0351	1.0478	1.0646	1.106	0.93461	0.91704	1.0224	1.0265	1.0668	0.99013	0.97514	0.97895		0.992	1.0276	1.0145	0.97526	0.9406	1.0485	1.0358	0.97418	0.99159	0.9514	1.0348		0.95416	0.85656	0.96265	0.98936	1.0377	1.0543
	-9		1.012	1.0435	0.97112	1.0051	1.0069	0.9726	0.99895	1.1045		1.1419	1.0549	0.95022	1.0543	0.98334	0.986	0.9965	0.94658	1.07	1.0352	0.98127	1.0017	0.94848	0.97953	1.0767	1.0028	0.96072	0.96683	0.98346		0.98623	0.99263	1.0765	0.97413	0.94248	0.93837	1.0115	0.99546	1.0475	0.97131	0.95292		0.98067	0.97884	1.0683	1.0591	0.93981	0.95932
	-6		0.95237	0.98833	0.93422	0.91657	1.0341	1.1619	1.0353	1.0097		1.0114	0.97651	0.98393	1.0642	1.0507	1.0361	0.97083	1.1061	0.99316	0.93738	1.0134	1.1367	1.1612	0.89166	1.0324	0.97373	1.0317	1.0224	0.99463		0.97846	1.0028	1.002	1.0068	1.141	1.0228	1.0512	1.0253	0.84764	1.0818	0.96182		1.0228	0.94037	0.96297	1.0205	0.95443	0.97842
	-3		1.0249	0.8665	0.92817	1.1989	1.0038	1.0799	1.0174	0.97993		1.0228	0.99623	1.058	1.0006	1.0373	1.0999	1.0678	0.96292	0.99674	0.89979	1.0883	1.1056	1.0779	1.1224	0.92693	0.96199	1.1667	1.0184	0.89289		0.95052	0.97133	0.9948	1.0508	1.1539	0.96204	0.94682	0.96728	1.0211	1.1	0.97807		1.0145	0.99852	1.0053	0.99461	1.0739	1.0128
	0		0.97547	0.84251	1.232	0.98636	1.054	1.0637	0.94468	0.92682		0.97987	0.95414	1.0506	0.9338	0.99115	0.97542	0.87154	0.93762	1.0293	1.1035	0.92637	0.96685	0.99025	1.0823	0.95845	0.95592	0.94243	1.0033	1.0391		1.1003	1.0187	0.88242	1.0102	0.97334	0.99534	0.9229	1.0891	1.048	1.1404	0.93547		0.99135	1.0219	0.98927	0.97732	0.97692	0.88208
	2		0.85412	0.76349	0.98027	0.90822	0.71685	0.88137	0.87851	0.95311		0.85455	0.92324	1.0709	0.92756	1.0138	0.8768	0.84096	0.88643	0.91547	0.99306	0.97335	0.87351	0.92179	0.83219	0.94051	0.98996	0.78593	0.89896	0.83181		1.0703	0.83079	0.94956	0.90132	0.92694	1.5355	0.80239	0.97267	0.94819	1.2913	0.96248		1.0524	0.95742	0.96569	1.4941	0.89075	0.71892
	3		0.86841	0.90935	0.98754	0.87182	0.74487	0.86902	1.0171	0.98947		1.0436	0.94703	1.0663	0.94998	0.98404	0.98802	0.79326	0.88115	0.85138	1.0672	0.98347	0.89337	0.85643	0.76657	0.99063	1.0259	0.88893	0.98773	0.9065		0.95353	0.67926	0.85444	0.85587	0.88373	1.2325	0.70317	1.1738	0.96219	1.2682	1.0689		0.90776	1.1328	1.0396	1.539	0.92782	0.69858
	4		0.96164	1.0442	0.92314	0.94678	0.88356	0.95403	1.0243	1.0055		1.04	0.98738	1.0674	0.9583	0.96374	0.87527	0.99324	0.88162	0.90861	1.179	1.0263	0.97942	0.8821	0.77503	0.98593	1.0002	0.92144	1.016	1.0996		0.94235	0.61435	0.91581	0.96182	1.0046	1.4589	0.75827	1.2461	1.0339	1.4101	0.99032		0.87198	1.1498	1.1115	1.4611	1.0373	0.79485
	5		1.0823	0.9595	1.0013	0.90901	0.71596	0.87342	1.03	0.9568		0.98579	0.95993	1.1427	0.98682	0.99147	0.88939	1.0507	0.92705	0.95102	1.1163	1.0705	1.0605	0.93418	0.75571	1.0319	1.0288	0.95926	1.0005	1.0895		0.99616	0.75885	0.89972	1.0553	0.96656	1.1585	0.75357	1.1291	1.0765	1.4416	0.98897		0.93166	1.1946	1.1371	1.2565	1.0311	0.83588
	8		1.0862	0.96927	0.80375	1.0943	1.1328	0.9357	1.0373	0.95234		1.0048	0.98766	1.0443	1.014	1.0154	0.93718	0.98411	1.0555	1.0061	0.99858	0.94326	0.91495	0.91379	0.84556	1.1099	1.1864	1.0402	0.92955	1.0569		0.95426	0.89243	0.99181	1.0142	1.0771	1.0813	0.7439	1.103	1.0209	1.227	1.064		1.0702	1.0696	1.0924	1.3293	1.0573	1.0401
	11		1.0067	0.82966	1.0049	1.0141	0.89915	0.89507	1.0074	0.91357		0.91792	1.1132	1.0908	0.9142	0.90546	1.0416	0.92056	1.1173	1.1586	1.0384	1.0025	1.0702	1.1567	0.9915	1.0591	1.2609	0.99909	0.91461	1.123		1.0693	0.94732	1.04	0.94222	1.0024	1.0163	0.92666	1.0864	1.192	1.2371	1.0413		1.0964	1.034	1.0507	1.1094	1.0271	1.1474
	14		1.0177	0.85815	0.884	0.94582	1.0758	0.77158	0.95227	1.0095		0.93695	1.0586	1.0864	0.97347	0.98326	0.96155	0.93059	1.0409	1.0105	0.95585	1.0784	1.0809	1.0883	0.97758	1.0984	1.1507	1.0007	0.92146	1.07		0.89954	0.93053	1.0098	0.9995	0.90154	1.043	1.0514	1.0724	1.4629	1.207	1.1058		1.16	0.96045	0.96882	1.1197	0.9259	1.1033
	17		0.98543	1.2839	0.96779	1.0469	1.1122	0.91982	0.92744	1.0605		0.92715	1.0393	1.0535	0.92709	0.99352	0.96656	0.92478	1.1638	0.92397	1.01	0.7756	1.1082	1.1969	0.93997	1.0309	1.0783	0.97203	0.98292	1.1203		0.92025	0.90087	1.0798	0.93477	0.99274	1.1343	1.1765	1.0031	1.2978	1.1929	1.1832		1.1456	1.054	0.95469	1.1181	1.0151	0.91926
	20		0.96951	1.2814	0.97825	1.0121	0.97167	0.92068	0.96163	0.96876		0.92324	1.091	1.0826	0.91393	1.0533	0.9922	1.0164	1.1685	1.0165	1.0526	1.2389	0.99162	1.0635	1.0723	0.87318	1.1327	0.95463	0.92356	1.067		0.98285	0.94401	0.99476	1.0037	1.0316	1.0579	1.1087	1.0262	1.171	1.5225	1.0247		1.1715	0.97626	0.93694	1.0447	1.0702	0.97293
	23		0.93907	1.1719	1.138	0.85577	1.0571	0.87268	1.0053	0.95703		1.0856	1.038	1.101	0.96601	0.98494	0.95432	0.97297	1.1615	0.97371	1.0327	1.1856	0.97955	1.0749	1.1471	0.89343	1.143	1.0571	0.9445	1.0209		1.0294	0.96976	0.98048	1.0024	0.95737	1.239	1.1452	1.0092	1.1452	1.3905	0.97057		1.0437	0.90334	0.95449	1.1399	0.94998	1.0252
	26		0.94273	1.1944	0.93914	0.87281	1.0473	0.85062	0.9969	1.1331		1.1635	1.0262	1.0126	0.97028	0.92072	1.003	0.98307	1.2888	0.99454	1.0896	1.121	1.0356	0.79968	1.0285	1.004	0.95443	0.95336	0.92753	1.0071		0.95155	0.9408	0.99788	0.91695	0.89566	1.2019	0.98994	1.0828	1.1538	1.4915	1.0534		1.1066	1.0403	0.93453	1.0382	0.93512	0.98912
	29		0.86031	1.0072	0.87715	0.8681	1.0901	0.96761	1.0273	1.0208		0.93419	1.0153	1.0114	1.0042	0.97581	0.94642	1.0249	1.1477	0.87273	0.93885	1.18	1.2373	0.92984	1.0954	0.97533	0.99116	0.97913	0.92883	1.1023		0.98239	0.93745	0.89605	0.90008	0.92827	1.0604	1.0175	1.1237	1.248	1.311	1.0207		1.0916	1.0167	0.93577	0.99452	0.98647	1.0399
	32		0.91639	0.85537	0.83112	1.0174	0.88834	1.0838	0.97999	1.1644		0.95223	1.0728	1.0441	0.91054	1.0758	0.93927	1.0185	1.0934	1.0708	0.98338	1.2392	1.1039	1.4062	0.91218	1.0343	0.91319	0.9619	0.90214	0.9765		0.99018	1.0054	0.98587	0.97906	0.97434	0.99982	0.96244	1.0216	1.1714	1.2211	0.99642		1.117	1.0122	0.85057	0.97407	0.91219	1.0404
	35		0.84755	1.0442	0.90304	0.94695	0.86452	1.1057	0.95456	0.97665		0.89836	1.0094	1.0904	1.023	0.97379	0.86516	1.0398	1.079	0.97138	0.9053	1.1214	1.0803	0.96173	0.99272	1.0847	1.0332	0.9134	0.8877	0.91675		0.9618	0.97848	1.1194	0.96198	0.94275	1.5248	1.0086	1.005	1.0613	1.2054	0.99866		1.117	1.0191	0.86547	1.0552	0.93894	0.99505
	38		1.1176	1.0091	0.92272	0.92823	0.94508	1.0579	0.88875	0.98893		1.0374	1.1219	1.109	0.94198	0.9026	0.97113	1.0183	1.1424	1.0419	0.93113	1.1854	0.9492	1.0528	1.0154	1.0603	1.032	0.88779	0.96687	0.8797		1.0898	0.98917	0.95179	0.94845	0.95663	1.3289	0.89258	0.9766	1.0567	1.1391	1.1082		1.1471	0.96042	0.91575	1.0786	1.0538	1.1707
	41		1.1894	1.0746	0.89312	0.97258	0.94911	1.0728	0.92439	1.0119		0.95762	0.94034	1.0424	1.0241	0.90335	1.0133	0.96275	1.1082	0.98771	1.0553	1.178	1.0724	1.0765	0.95842	0.99192	0.95155	0.96826	0.90386	1.0244		1.015	0.9856	0.99789	0.98641	0.95911	1.2434	0.98039	0.99084	1.5014	1.1576	1.0409		1.1629	0.92747	0.93439	1.1274	0.99616	1.0579
	44		1.0996	1.1277	0.94315	1.0998	0.90507	1.0074	0.93233	0.97774		1.0059	0.95238	1.0024	1.0191	0.9261	0.98112	1.125	1.0383	0.99466	1.0363	1.1045	1.1117	1.1067	0.91568	1.0044	0.94707	0.92168	0.92026	0.91092		1.0875	0.96593	0.92828	1.0013	0.98168	1.225	0.97562	1.0027	1.356	1.1528	1.0891		1.0711	0.98659	0.98878	1.0881	1.1324	0.93332
	47		1.0048	0.95152	0.93122	0.89869	1.2021	0.98303	0.90087	1.0131		1.0185	0.97133	1.0779	0.9484	0.8755	1.0142	1.1163	1.0805	0.9509	1.0898	1.1869	0.81042	0.93815	0.89953	1.0966	0.85416	0.99591	0.96861	1.1595		1.0741	0.94038	0.92538	1.0232	1.0482	0.95292	0.98755	1.0274	1.3245	1.0854	1.0222		0.93756	0.8842	0.98849	1.1609	0.93654	0.90343
	50		1.0115	0.86122	1.0626	1.1479	1.0897	0.95252	0.99341	1.0141		1.0321	1.2104	1.1735	1.0167	0.99508	0.95315	0.99418	1.086	0.9131	1.0751	0.88768	0.96922	0.99066	0.96363	1.0957	0.89686	1.0211	0.95167	1.1031		1.0211	1.0051	0.93613	1.0288	0.91853	1.1002	0.89015	0.92636	1.3619	1.1051	1.065		1.0092	0.96792	0.97847	1.1046	1.0069	0.88753
	53		1.0375	1.0562	0.99763	1.0255	1.1192	0.93262	1.0536	1.0068		0.79791	1.1076	1.1101	1.1247	0.94485	1.0878	0.98928	1.0237	0.94259	1.0309	1.2039	1.1125	1.1306	0.8653	1.0147	0.93615	1.0031	0.97334	1.029		1.0238	1	0.88539	1.0261	0.97899	1.352	0.90049	1.0155	1.0817	1.0984	1.1054		1.0003	0.82972	0.97429	1.053	0.95857	0.83359
	56		0.9251	1.2511	1.0052	0.95114	1.0451	0.95146	1.1045	0.87183		0.94779	1.0666	1.0979	1.0371	0.9462	1.0587	0.99059	1.0371	0.98689	1.0026	1.1405	0.93097	1.0991	1.1178	0.87249	1.0193	0.97605	0.96483	0.97824		1.013	1.0383	0.89124	0.96233	1.046	1.0792	0.87016	0.93392	1.1373	1.0704	1.0669		1.2279	1.1039	1.0077	1.0744	0.87561	0.97387
	59		1.0099	1.2127	0.99599	0.94025	1.0305	0.92121	1.0694	0.88068		1.0583	0.9055	1.0592	1.0401	0.90049	1.0328	0.96424	0.98409	0.8713	1.007	1.0056	1.011	0.9536	0.99269	0.9857	1.0019	0.92681	0.95482	0.90515		0.97623	1.0513	0.91181	1.0963	1.0525	0.96738	0.89266	0.93124	1.0484	1.0959	1.0212		1.0089	0.93759	1.0148	1.148	1.0307	0.93964
	62		1.0468	1.3286	1.2206	0.93397	0.87501	0.96517	1.0925	0.90697		0.96676	1.01	1.0348	1.0112	0.91398	1.189	0.96515	1.0176	0.96803	0.9458	1.002	1.0132	0.94276	1.0865	0.92994	0.98905	1.0268	0.96045	0.87424		1.0054	1.0755	1.113	1.0689	0.9261	1.1978	0.91553	0.96258	1.0856	1.0756	0.93521		0.96878	1.0336	0.97809	1.0944	1.0087	0.99525
	65		1.0014	1.2726	1.2036	0.96042	0.6873	0.9259	1.1136	1.0538		1.0459	1.0437	0.99301	1.013	0.84012	1.0355	0.90918	1.0196	0.93038	0.89339	0.90769	0.93363	0.94333	1.0466	0.94717	1.0361	0.98147	0.98244	0.98882		0.91961	1.1292	1.0902	1.0166	0.9224	1.0948	0.95213	1.0489	0.99446	1.0351	1.0283		0.9748	1.1165	0.98558	1.0602	1.0998	1.002
	68		0.94851	1.0046	1.0335	0.91537	0.7709	0.89047	1.0833	0.97639		0.97408	0.97476	1.0546	0.99257	0.94934	1.0403	0.93936	1.0217	1.0655	0.92873	1.0119	0.96336	0.95618	0.89341	0.93506	0.94331	1.0723	1.0925	1.0073		1.0018	1.1281	1.0836	0.9715	0.99069	1.047	0.98552	0.95308	0.98791	1.0625	1.0602		1.0066	1.0932	1.0552	1.0519	1.0089	1.0327
	71		1.0335	0.96225	0.8831	0.91198	1.3679	0.82213	1.0211	0.99647		1.0334	0.97884	1.1124	0.96245	0.99215	0.98355	0.94006	1.0408	1.0829	1.0481	0.9375	0.94512	0.86694	1.0546	1.0066	1.0103	1.0094	1.1817	0.99232		1.0358	1.1176	1.094	0.95091	0.93797	0.94698	0.95396	1.0009	0.977	1.0774	0.91574		1.1087	0.97091	1.0133	0.98663	0.96147	0.97643
	74		1.0152	1.0153	1.0198	1.0247	0.95799	0.88368	1.0172	1.0143		0.95338	1.1015	1.0277	0.91589	1.0565	0.9887	0.92164	1.024	1.0234	1.0155	0.93358	0.98963	0.99941	1.0199	0.93229	0.98663	0.99916	1.0245	1.0191		0.88245	1.0897	1.0427	0.93638	0.89872	1.112	0.93392	1.0571	1.028	1.1513	0.9162		1.0189	1.0667	1.0933	0.98305	0.92264	1.0333
	77		0.98657	0.85396	1.2604	0.77827	0.96881	0.91887	1.0138	0.94269		1.0404	1.001	1.0416	0.95453	1.0602	0.94617	0.94613	0.91984	0.98562	0.94667	1.0438	0.98087	0.97959	0.85669	0.99609	1.108	1.01	0.93539	1.0058		0.97356	1.1562	1.0264	0.94282	1.0053	1.0045	0.92012	1.0646	1.0177	1.1724	0.88677		0.96203	1.0485	1.1149	1.1095	0.98725	0.96806
	80		0.9618	0.96347	1.0097	0.99511	0.91699	0.98298	0.94424	0.95043		1.0435	0.90824	1.0144	0.90422	1.0596	0.92021	0.95258	1.0015	1.0323	1.0718	0.9674	0.95935	0.8884	0.83981	0.98844	1.1026	1.0224	0.91975	1.16		0.93831	1.1	0.96019	0.95529	1.0994	1.0719	0.95833	0.99038	1.0366	1.1023	0.93484		0.98113	1.1613	1.0722	1.0057	1.1013	0.92481
	83		0.9062	0.82459	0.86098	1.0417	0.86714	0.89903	1.0057	0.88304		0.96802	1.0196	1.0498	0.98419	1.1177	0.97126	0.95077	1.0621	0.98327	1.0667	1.0613	1.001	0.89549	0.86972	1.053	1.1025	0.96655	0.98266	1.0481		0.9913	1.1405	0.96824	1.0887	0.97294	1.0712	0.92831	1.0561	0.89127	1.0696	1.017		1.0133	1.0356	1.133	0.99091	1.0857	0.90706
	86		1.0006	0.7213	0.89256	1.0569	0.84844	0.95203	0.98562	1.0087		0.864	0.96666	1.0168	0.96924	1.0968	0.87024	1.0543	0.9323	0.93296	1.0299	0.95614	0.97393	0.82508	0.88697	1.082	1.0973	0.88911	0.93377	1.077		1.0122	1.1561	0.96096	1.041	1.0068	1.1107	1.0096	1.0676	1.0135	1.0206	1.0191		1.0345	1.1876	1.0635	1.0334	1.0779	0.91412
	89		0.93999	0.92339	0.82894	1.0698	0.79093	0.92455	0.99937	1.0336		0.95472	1.0102	0.92286	0.92444	1.0852	0.85425	1.0174	0.85983	1.0247	1.0478	0.91085	0.90975	0.89724	0.88298	1.084	1.0798	0.89535	0.94628	0.95771		1.0047	1.1503	0.98614	1.0334	0.99678	1.017	0.97467	1.0833	0.98042	0.98047	1.019		0.96451	0.99099	1.0737	1.046	1.1595	0.95803
	92		0.9423	0.94335	0.77561	1.0219	0.77406	1.1424	0.9739	1.2259		1.1251	0.93514	0.9344	1.0327	1.1514	0.92158	0.95531	0.885	0.90255	1.0976	1.0189	1.1131	0.92628	0.87716	0.9992	1.0882	0.90141	0.94853	0.86324		0.99623	1.1426	0.84338	1.0212	0.92891	1.017	0.94278	1.1255	1.0283	1.2098	1.0189		0.87633	0.96027	1.09	1.0955	1.1733	0.93259
[truncated: 52 more columns]

## Sheet: Figure 3C
	EGFP	0.53625	1.1435	0.60525	0.35305	0.99503	0.45759	1.1654	1.3196
	shRNA against LacZ	0.7276	0.8286	1.4331	0.92574	0.91242	1.4801	1.2952
	shRNA against PKC-Calpha	0.35093	0.10157	0.57181	0.054737	0.34916	0.50644	-0.15694	0.448	0.020917	1.5999	0.17518	0.60787	-0.32852	-0.057222	1.2324	-0.22762	0.42115
	shRNA co-expressed with wildtype PKA	1.1415	0.72588	1.2889	0.99495	1.0703	0.31312	0.51165	0.7652	0.60544
	shRNA co-expressed with R-C	0.32624	1.6608	-0.38203	-0.13172	0.11018	0.1555	0.061546	0.82056	0.31021	0.022018	-0.53677
