# Supplementary material for: PKA regulation of neuronal function requires the dissociation of catalytic subunits from regulatory subunits
Source: eLife. 2024 Nov 7;13:RP93766. doi: 10.7554/eLife.93766 (PMC11542917; doi:10.7554/eLife.93766)
Supplement: Figure 4—source data 1. [file elife-93766-fig4-data1.xlsx]

## Sheet: Sheet1
sh-LacZ	AMPA	untransfected	91.8595	56.0524	73.6514	53.3768	113.352	145.799	74.4962	116.152	100.61	159.249	114.703	154.167	129.01
		transfected	78.7646	123.756	136.261	78.4177	126.971	140.723	144.332	134.491	98.4466	78.5248	98.6695	93.6963	92.0032
	NMDA	untransfected	53.054	62.0053	65.0976	51.9019	89.3108	103.02	46.3799	69.1446	53.8058	81.005	131.083	107.349	77.1649
		transfected	32.0829	80.1989	63.9189	64.0472	83.8977	93.2932	100.922	93.6138	81.001	110.802	143.213	104.658	63.2253
	AMPAR/NMDAR ratio	untransfected	1.73143	0.903994	1.1314	1.02842	1.26918	1.41525	1.60622	1.67984	1.86988	1.96591	0.875037	1.43613	1.67187
		transfected	2.45503	1.54311	2.13177	1.22437	1.5134	1.5084	1.43013	1.43665	1.21538	0.708695	0.68897	0.895264	1.45516
sh-PKA-C	AMPA	untransfected	82.3976	116.656	62.5949	134.144	62.6475	76.2726	98.233	102.93	143.642	66.7858	56.8307
		transfected	30.6682	20.3295	24.1784	29.3448	34.1567	30.2991	62.1114	47.5031	64.9149	10.5942	6.3602
	NMDA	untransfected	202.9	14.2079	32.6823	34.6617	41.6098	24.1556	82.0146	71.0409	90.8716	59.8813	58.0177
		transfected	141.49	30.092	50.7432	41.1781	86.8288	74.491	79.4816	66.4887	93.534	39.2107	46.073
	AMPAR/NMDAR ratio	untransfected	0.4061	8.21067	1.91525	3.87011	1.50559	3.15755	1.19775	1.44888	1.58071	1.1153	0.979541
		transfected	0.216752	0.675578	0.476486	0.712631	0.39338	0.406748	0.781456	0.714454	0.694025	0.270186	0.138046
sh-PKA-C / PKA-C	AMPA	untransfected	53.8283	79.8679	93.9752	108.747	109.433	100.944	84.5783	62.2635	103.696	97.4132	104.283
		transfected	57.687	81.1476	96.9208	102.528	134.229	95.8615	123.575	94.729	93.6828	63.165	98.2931
	NMDA	untransfected	69.8926	78.7329	122.587	62.3094	64.1106	71.2723	98.2374	79.639	118.263	60.3834	73.5052
		transfected	81.2374	68.4952	114.591	81.2929	66.4455	56.458	75.2485	46.256	89.8989	72.2701	69.1925
	AMPAR/NMDAR ratio	untransfected	0.770157	1.01442	0.766599	1.74528	1.70694	1.41631	0.860958	0.781822	0.876827	1.61324	1.41872
		transfected	0.710104	1.18472	0.845796	1.26121	2.02014	1.69793	1.64222	2.04793	1.04209	0.874013	1.42057
sh-PKA-C / R-C	AMPA	untransfected	87.5121	101.309	87.3193	93.4974	59.8035	78.717	96.084	74.5399	63.4118	124.715	80.0236	206.026	169.032	100.699	69.2427
		transfected	66.09	24.5366	54.7267	32.7817	34.3374	41.2223	36.6055	16.4783	11.1006	19.9308	17.0012	17.7799	25.7303	13.9909	19.5981
	NMDA	untransfected	91.4223	75.4348	42.4524	63.0396	80.0131	102.893	97.47	54.6809	69.1865	57.6852	59.5244	119.592	97.7564	75.1638	87.3644
		transfected	188.968	47.6193	75.5243	48.2841	81.6729	78.584	109.492	34.8915	52.6621	63.9212	87.8124	83.1049	90.166	81.6253	89.8619
	AMPAR/NMDAR ratio	untransfected	0.957229	1.343	2.05688	1.48315	0.747421	0.76504	0.98578	1.36318	0.916534	2.162	1.34438	1.72274	1.72911	1.33973	0.792573
		transfected	0.349742	0.515266	0.724624	0.678934	0.420426	0.524564	0.334322	0.472273	0.210789	0.311803	0.193608	0.213945	0.285366	0.171404	0.218091
